1 Frequent sexual reproduction limits adaptation in  
2 outcrossed populations of the alga *Chlamydomonas*  
3 *reinhardtii*

4 Felix Moerman<sup>1,\*</sup>, Nick Colegrave<sup>1,\*</sup>,

5 1. Institute of Ecology and Evolution, School of Biological Sciences, The University of  
6 Edinburgh, King's Buildings, Edinburgh EH9 3JT, United Kingdom

7 \* Corresponding authors

8 **Keywords: Sexual reproduction, Local adaptation, Experimental evolution**

9 **Running head: Chlamydomonas frequency of sex**

10 **Abstract**

11 Sexual reproduction can facilitate adaptation of populations by reshuffling existing ge-  
12 netic variation or new mutations. However, sexual reproduction can also bear costs. Such  
13 costs come in two forms, direct costs and evolutionary costs. Direct costs are associated  
14 with the cost of producing males (twofold cost of sex) and the typically slower cell division  
15 during sexual reproduction. Evolutionary costs occur when too frequent sexual reproduc-  
16 tion would hinder adaptation, by breaking apart adaptive allele combinations. Whereas the  
17 direct costs of sexual reproduction have been studied extensively, the evolutionary costs of  
18 sex remain less well understood. We investigate how the frequency of sexual reproduction  
19 affects adaptation to a non-stressful and a stressful environment in populations of the green  
20 alga *Chlamydomonas reinhardtii*, while minimizing the direct costs of sexual reproduction.  
21 Contrary to previous studies, we found that an increasing frequency of sexual reproduction  
22 hindered adaptation up to the point where adaptation was entirely prevented, suggesting

23 strong evolutionary costs associated with too frequent sexual reproduction. This observa-  
24 tion may explain the low frequency of sexual reproduction observed in many facultative  
25 sexual species.

## 26 **Introduction**

27 The geographical ranges that species occupy in the natural world are determined by how well  
28 those species are adapted to their abiotic environment (e.g. climatic conditions, soil compo-  
29 sition) and their biotic environment (e.g. competitive interactions, predator-prey interactions,  
30 parasite-host interactions) [1–4]. Therefore, the long term survival of species depends strongly  
31 on their ability to adapt to any changes that occur in their environment. One important mech-  
32 anism that affects the potential to adapt is the reshuffling of genetic variation through sexual  
33 reproduction [5,6]. Sex can affect adaptation of species in several ways (reviewed in Hartfield  
34 and Keightley, [7]) by purging deleterious mutations, aiding adaptation by bringing together  
35 and fixing novel adaptive mutations, or by recombining existing variation that can for example  
36 help in resisting parasite infections (red queen hypothesis).

37 Recent experimental work has demonstrated that sexual reproduction may speed up adap-  
38 tation of species. For example, evolution experiments with populations of algae [8,9], protists  
39 [10–13] and yeast [14,15] have demonstrated that sexual reproduction can facilitate adaptation  
40 of populations to their biotic or abiotic environment. Additionally, it has been shown experi-  
41 mentally that sexual reproduction is under positive selection when environmental complexity  
42 increases [12,16]. Similarly, sexual reproduction has been shown to be advantageous in nat-  
43 ural populations, for example by facilitating adaptation of species to the local environment  
44 by introgression of locally adapted genes [17], or by facilitating the escape from parasitism  
45 [18]. Despite these benefits of sexual reproduction, many species including plants [19], fungi  
46 [20], invertebrates [21,22] and certain vertebrate species [21,23] reproduce both sexually and  
47 asexually. Moreover, in many of these species, sexual reproduction is only occasional. These  
48 observations suggests that while sex can facilitate adaptation, it also can be costly. These costs  
49 can come in two forms. Direct costs of sex are associated with the need for investment of  
50 resources in males (two-fold cost of sex [7,24,25]), and with the typically slower cell divi-

51 sion during sexual reproduction. Evolutionary costs occur when sexual reproduction hinders  
52 adaptation because too frequent reshuffling of genetic material would break up adaptive com-  
53 binations, and prevent effective selection. Whereas past work has investigated the direct costs  
54 extensively, the evolutionary costs of sexual reproduction have received less scrutiny. Theo-  
55 retical work predicts that only occasional sexual reproduction is favourable [26–31], however  
56 experimental scrutiny of this prediction is currently largely lacking.

57 In this experiment, we investigated how the frequency of sexual reproduction affects adap-  
58 tation of genetically diverse and outcrossed populations of the green alga *Chlamydomonas*  
59 *reinhardtii*. Specifically, we aimed to directly assess how the frequency of sexual reproduction  
60 affected evolutionary adaptation, under a situation where direct costs (i.e. slower cell division  
61 and twofold cost of sex) were minimised. To do so, we assessed how increasingly frequent  
62 sexual reproduction affected adaptation in a stressful environment (increased concentration of  
63 salt, previously used as a stressful environment [32,33]; "salt lines") and in a non stressful  
64 environment (non-elevated salt concentration; "no salt lines"). We designed our experiment  
65 in such a way that the evolution lines experienced an approximately equal number of genera-  
66 tions, independent of the frequency of sexual reproduction, to minimize direct costs associated  
67 with sexual reproduction. We then assessed how the frequency of sexual reproduction affected  
68 adaptation to both the selection environment that populations experienced during experimental  
69 evolution, and trade-offs in growth in the second environment (see also Figure 1).

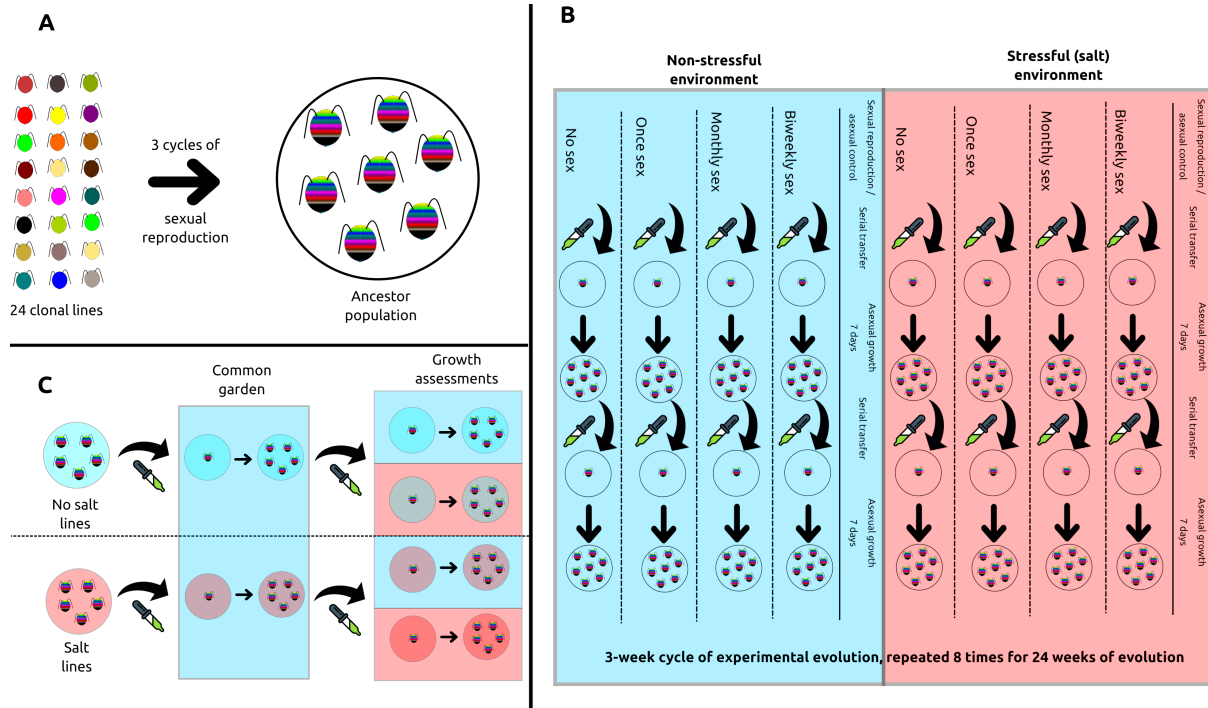

**Figure 1: Schematic representation of the experimental setup.** A) We created a genetically diverse and outcrossed ancestor population by mixing together 24 clonal lines of *Chlamydomonas reinhardtii*, and subjecting them to three cycles of sexual reproduction. B) We started the evolution experiment using this ancestor population, and subjected evolution lines either to a non-stressful environment (blue) or a stressful environment (red). Evolution lines experienced different frequencies of sexual reproduction (none, once, monthly or biweekly). For each combination of the environment and frequency of sexual reproduction, we maintained six replicate evolution lines. The evolution lines experienced a total of 24 weeks of evolution, during which we repeated the same three week cycles, consisting of a sexual reproduction/asexual control phase, followed by two cycles of asexual growth. C) After experimental evolution, we subjected the evolution lines (blue circle=no salt lines; red circle=salt lines) to a common garden phase (non-stressful environment; blue box), and subsequently grew them in both environments (blue box=non stressful environment; red box=stressful (salt) environment) to measure adaptation to the selection environment and trade-offs with growth in the second environment.

## 70 **Results**

### 71 **Aims and hypotheses**

72 We investigated how the frequency of sexual reproduction and the evolutionary history (salt  
73 lines versus no salt lines) affected adaptation to the environment experienced during selection  
74 and trade-offs in adaptation to different environments. Specifically, we investigated how these  
75 factors affected the change in intrinsic rate of increase  $r_0$  and the equilibrium population den-  
76 sity  $K$  in the abiotic environment that populations experienced during experimental evolution  
77 (adaptation to selection environment) and in both abiotic environments (evolutionary trade-  
78 offs).

79 Because we minimize direct costs associated with sexual reproduction, we could expect to  
80 see different relations between the frequency of sexual reproduction and the degree of adaptive  
81 evolutionary change (i.e. adaptation to the selection environment, measured as change in the  
82 intrinsic rate of increase  $r_0$  or the equilibrium density  $K$ ). If sexual reproduction consistently  
83 facilitates adaptation, and there are no evolutionary costs associated with too frequent sexual  
84 reproduction, we would expect to see that the degree of adaptation increases directly with an  
85 increasing frequency of sexual reproduction (Figure 2, dark teal line). If, however, sexual  
86 reproduction is not costly, but too frequent sex would no longer aid adaptation, we would  
87 expect to see that the degree of adaptive evolutionary change initially increases quickly with the  
88 frequency of sexual reproduction, but this increase diminishes and levels off as the frequency  
89 of sexual reproduction increases further (Figure 2, light teal line). When too frequent sex  
90 would start to hinder adaptation, we would however expect that either the degree of adaptive  
91 evolutionary change start to decrease if sexual reproduction would be too frequent (Figure  
92 2, light brown line), or potentially even at low frequencies of sexual reproduction, entirely  
93 preventing any adaptive evolutionary change as sexual reproduction becomes more frequent  
94 (Figure 2, dark brown line). Based on theoretical predictions [26–31], we hypothesize that  
95 intermediate frequencies of sexual reproduction may have the most beneficial effect on adaptive  
96 evolutionary change, but too frequent sexual reproduction may become costly by breaking up  
97 beneficial allele combinations, and thus preventing effective selection (mild cost; Figure 2, light

98 brown line). Based on past experiments [8–15,34], we would however expect that the benefits  
99 of sexual reproduction will be larger for those populations that experienced evolution in the  
100 stressful environment (salt lines) than in the non-stressful environment (no salt lines).

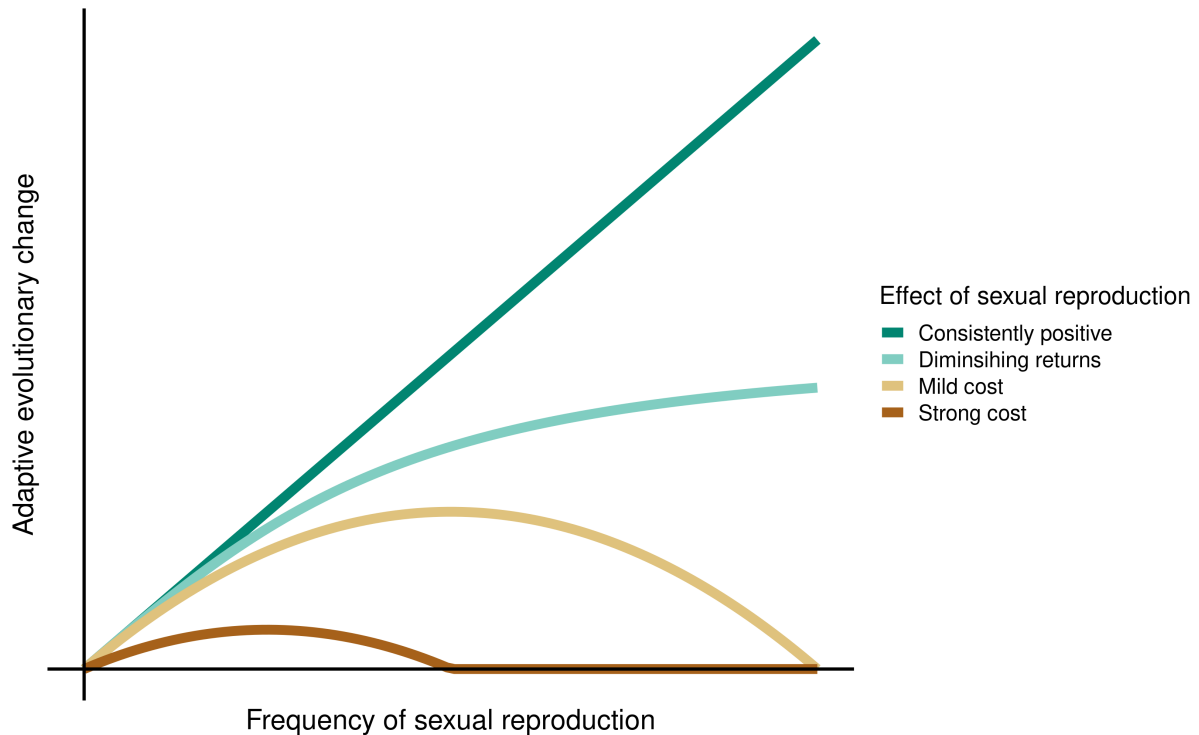

Figure 2: **Hypothetical relation between the frequency of sexual reproduction and the degree of adaptive evolutionary change that a species may experience.** We here show four hypothetical cases of a relation between the frequency of sexual reproduction and the degree of adaptive evolutionary change that we could expect to see in our experiment. Depending on the evolutionary costs and benefits, we could expect to see that either 1) sexual reproduction consistently facilitates adaptive evolutionary change (dark teal), 2) sexual reproduction has no evolutionary cost, but has diminishing return when species engage increasingly frequent in sexual reproduction (light teal), 3) too frequent sexual reproduction can have a mild cost, and reduces adaptive evolutionary change (light brown) or 4) where even low frequencies of sexual reproduction can become costly and start to reduce the degree of adaptive genetic change (dark brown). Note that this figure only shows evolutionary costs, not direct costs such as slower division rates.

## 101 **Adaptation to the selection environment**

### 102 **Intrinsic rate of increase $r_0$**

103 The intrinsic rate of increase  $r_0$  was affected by the evolutionary history, the frequency of sex-  
104 ual reproduction, as well as the interaction between these two factors. For both the salt lines  
105 and the no salt lines, the intrinsic rate of increase changed less when the evolution lines ex-

106 perience a higher frequency of sexual reproduction during the evolution experiment. In case  
107 of the no salt lines, (frequency of sexual reproduction;  $\chi^2_3=19.172$ ,  $p<0.001$ ; Figure 3), the  
108 change in  $r_0$  was reduced by 0.11 and 0.35 for the evolution lines that experienced monthly or  
109 biweekly sexual reproduction, respectively. This negative effect of more frequent sexual repro-  
110 duction was even more pronounced for salt lines (Evolutionary history  $\times$  frequency of sexual  
111 reproduction;  $\chi^2_3=8.041$ ,  $p=0.045$ ; Figure 3 right panel). Compared to the populations that  
112 experienced no sexual reproduction, the change in  $r_0$  of salt lines was reduced by respectively  
113 0.12 if they experienced sexual reproduction once, by 0.38 if they experienced monthly sexual  
114 reproduction, and by 0.71 if they experienced biweekly sexual reproduction. Notably, both in  
115 the no salt lines and the salt lines, the evolution lines that experienced the highest frequency  
116 of sexual reproduction (biweekly) grew approximately as fast as the ancestor population, sug-  
117 gesting that adaptation was entirely prevented when experiencing a high frequency of sexual  
118 reproduction. Additionally, we observed that in the absence of sexual reproduction,  $r_0$  of salt  
119 lines increased more strongly than the  $r_0$  of no salt lines, relative to the ancestor (evolution-  
120 ary history;  $\chi^2_1=8.769$ ,  $p=0.003$ ; Figure 3). For full statistical output, see the Supplementary  
121 Material section S4.1.

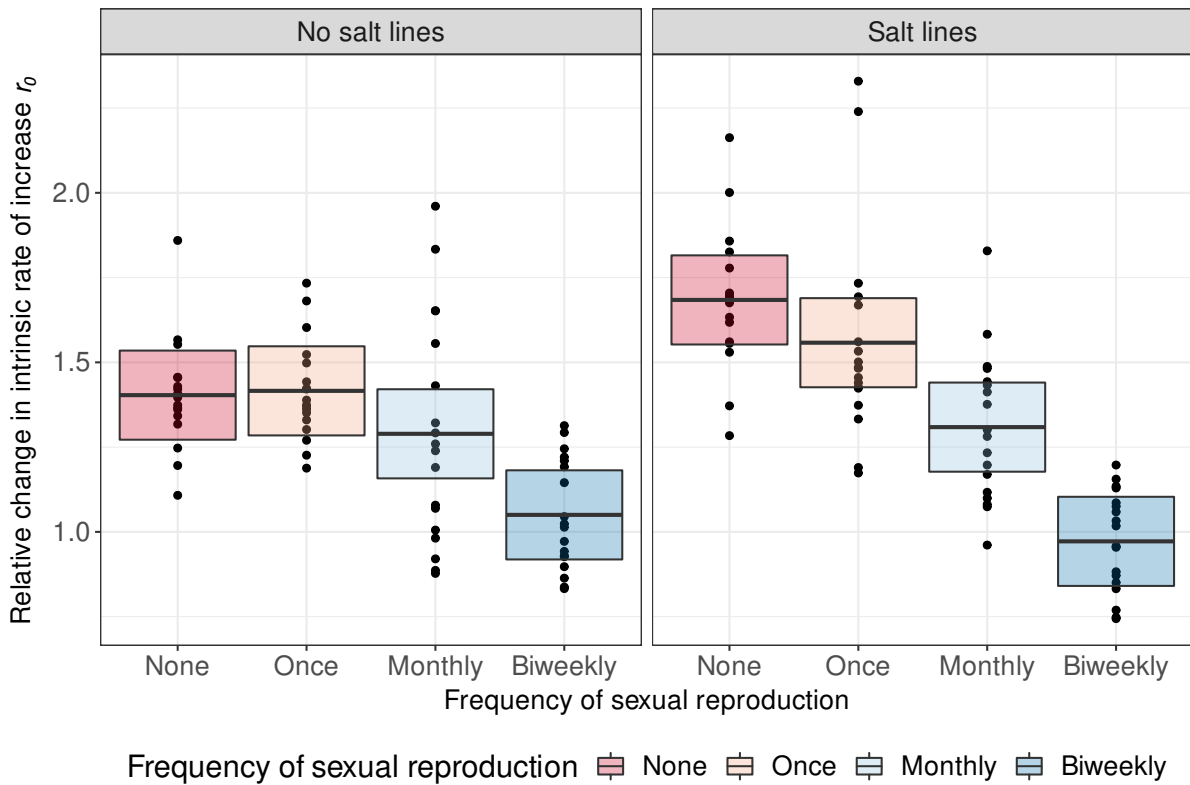

122 **Equilibrium population density  $K$**

123 Contrary to the intrinsic rate of increase, we observed that the change in the equilibrium density  
124  $K$  was not affected by the frequency of sexual reproduction. We observed however a clear effect  
125 of the evolutionary history, where salt lines showed stronger adaptation to the local environment  
126 in terms of the equilibrium population density than the no salt lines (Evolutionary history;  
127  $\chi^2_1=22.178$ ,  $p<0.001$ ; Figure 4). Full statistical output can be found in the Supplementary  
128 Material section S4.2.



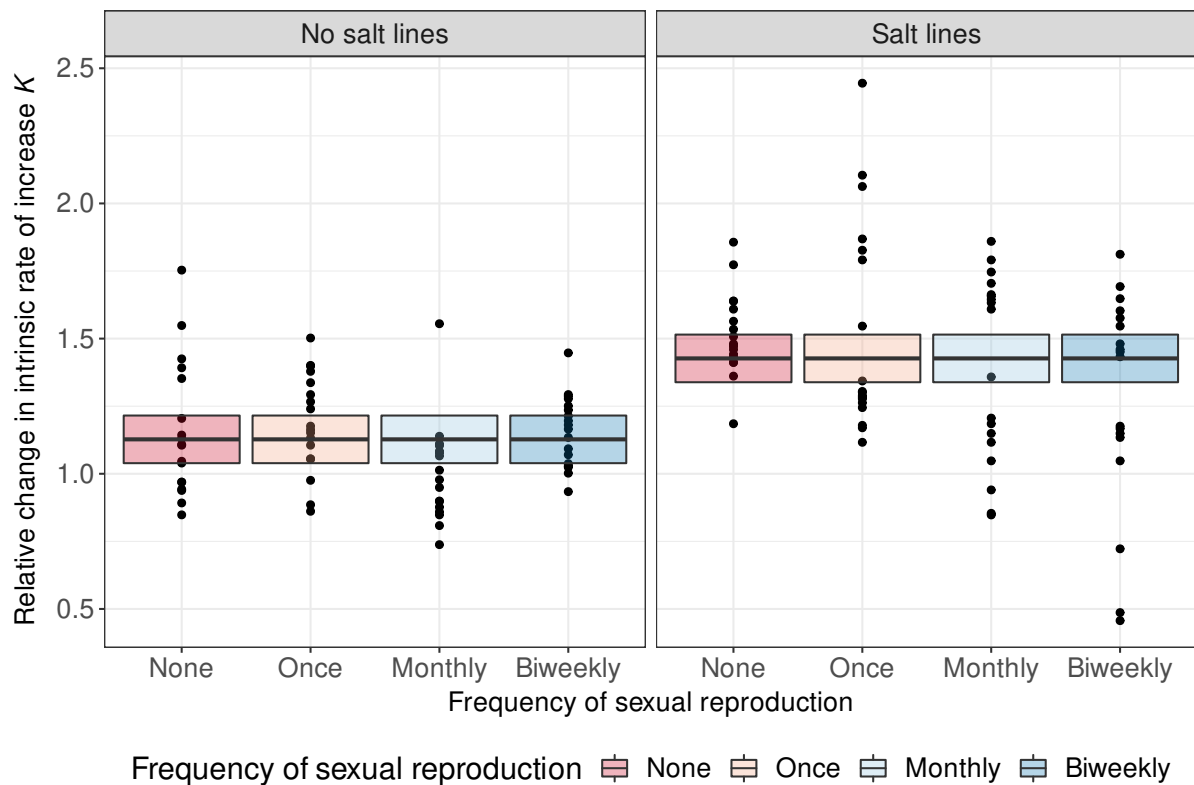

Figure 4: **Evolutionary history shapes the change in the equilibrium density  $K$ .** The left panel shows data and model predictions for adaptation to the local environment (equilibrium population density) for the no salt lines, and the right panel for the salt lines. Circles represent individual measurements of change in equilibrium population density of evolved lines, relative to the ancestor. Boxplots show the model predictions (black lines) and 95 % confidence intervals (shaded areas) for the fixed effect estimates of the best fitting model. Colours represent the frequency of sexual reproduction during experimental evolution.

## 129 Evolutionary trade-offs

130 Next, to assess whether the evolution lines experienced any trade-offs in growth between the  
131 selection environment and the other environment, we assessed the correlated response of re-  
132 spectively the intrinsic rate of increase  $r_0$  and the equilibrium density  $K$  for both environments.

### 133 Intrinsic rate of increase $r_0$

134 The change in the intrinsic rate of increase  $r_0$  was affected by the frequency of sexual repro-  
135 duction, the evolutionary history of the evolution lines, as well as by the abiotic environment.  
136 More specific, we found that on average, the no salt lines increased more strongly in  $r_0$ , irre-  
137 spective of the abiotic environment (evolutionary history;  $\chi^2_1=12.982$ ,  $p=0.0003$ ; Figure 5).

138 Both salt lines and no salt lines grew significantly slower in the salt environment than in the no  
139 salt environment (abiotic environment;  $\chi^2_1=21.631$ ,  $p<0.0001$ ; Figure 5). Independent of the  
140 evolutionary history and the abiotic environment, we found that an increasing frequency of sex-  
141 ual reproduction led to a smaller increase in  $r_0$  (frequency of sexual reproduction;  $\chi^2_3=30.583$ ,  
142  $p<0.0001$ ; Figure 5). We observed that the negative effect of too frequent sexual reproduction  
143 was stronger for the salt lines than for the no salt lines (evolutionary history  $\times$  frequency of  
144 sexual reproduction;  $\chi^2_3=10.200$ ,  $p=0.0169$ ; Figure 5 right panels). However, we found no  
145 statistical indication of trade-offs in terms of the intrinsic rate of increase  $r_0$  (i.e. no significant  
146 interaction effect between the evolutionary history and the abiotic environment).

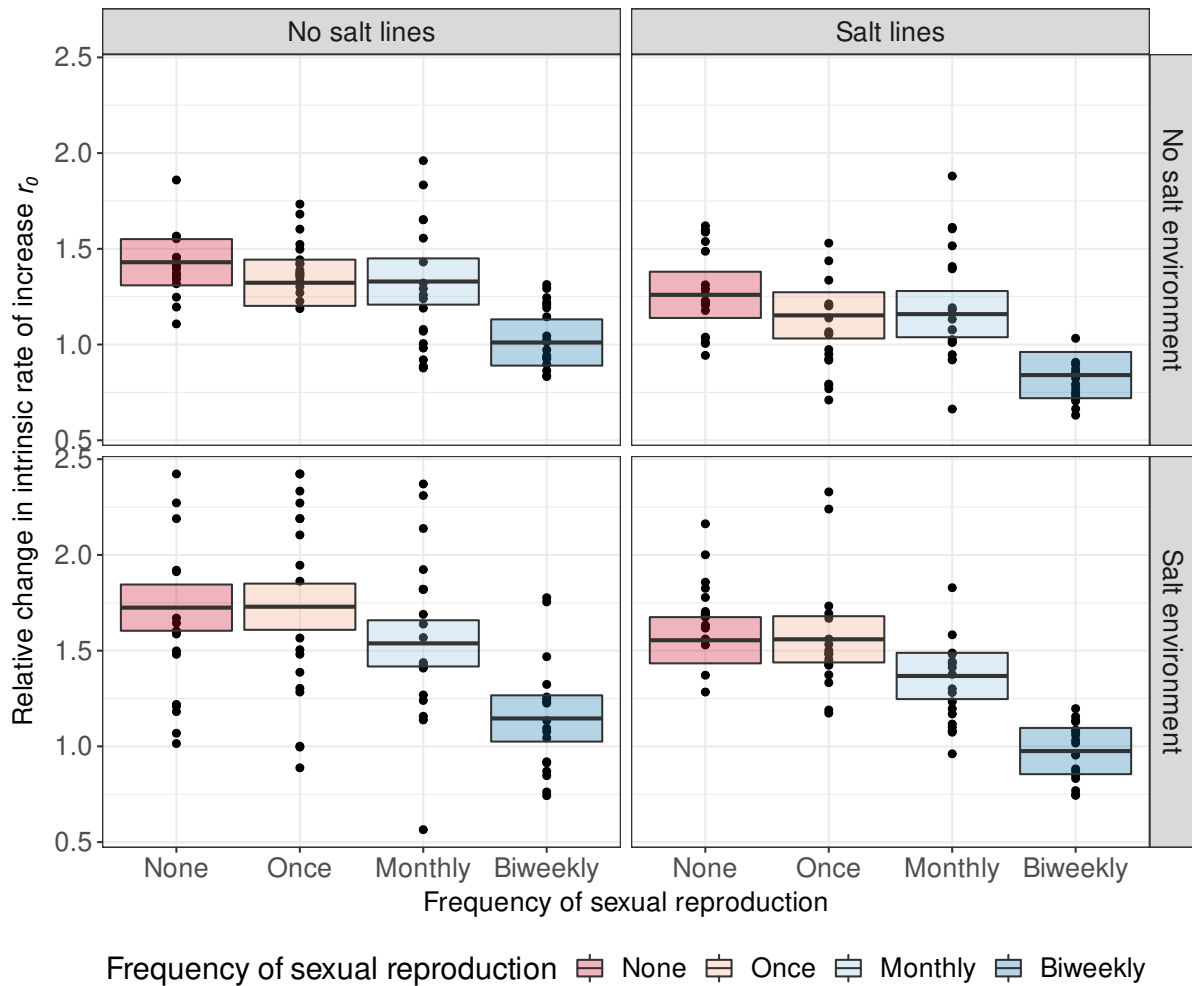

**Figure 5: Higher frequency of sexual reproduction reduces change in the intrinsic rate of increase  $r_0$ .** The left panel shows data and model predictions for evolutionary trade-offs (intrinsic rate of increase) for the no salt lines, and the right panel for the salt lines. Circles represent individual measurements of change in intrinsic rate of increase of evolved lines, relative to the ancestor. Boxplots show the model predictions (black lines) and 95 % confidence intervals (shaded areas) for the fixed effect estimates of the best fitting model. Colours represent the frequency of sexual reproduction during experimental evolution.

147 **Equilibrium population density  $K$**

148 We observed that the equilibrium population density  $K$  was affected by the abiotic environment  
 149 and the evolutionary history of the evolution lines, as well as their interaction. Specifically,  
 150 we observed that  $K$  increased on average more strongly in the salt environment than in the no  
 151 salt environment (abiotic environment;  $\chi^2_1=11.202$ ,  $p=0.0008$ ; Figure 6). In the no salt en-  
 152 vironment, no salt lines showed a stronger increase in  $K$  than salt lines (evolutionary history;  
 153  $\chi^2_1=4.741$ ,  $p=0.030$ ; Figure 6). However, in the salt environment, we observed the exact op-

154 posite patters, as the equilibrium population density  $K$  of salt lines increased more strongly  
 155 than for the no salt lines (abiotic environment  $\times$  evolutionary history;  $\chi^2_1=23.213$ ,  $p<0.0001$ ;  
 156 Figure 6). Overall, these results suggest that there is a trade-off in adaptation between the two  
 157 environments, in terms of the equilibrium population density  $K$ . But we found no statistical  
 158 indication that this trade-off was affected by the frequency of sexual reproduction in this data.

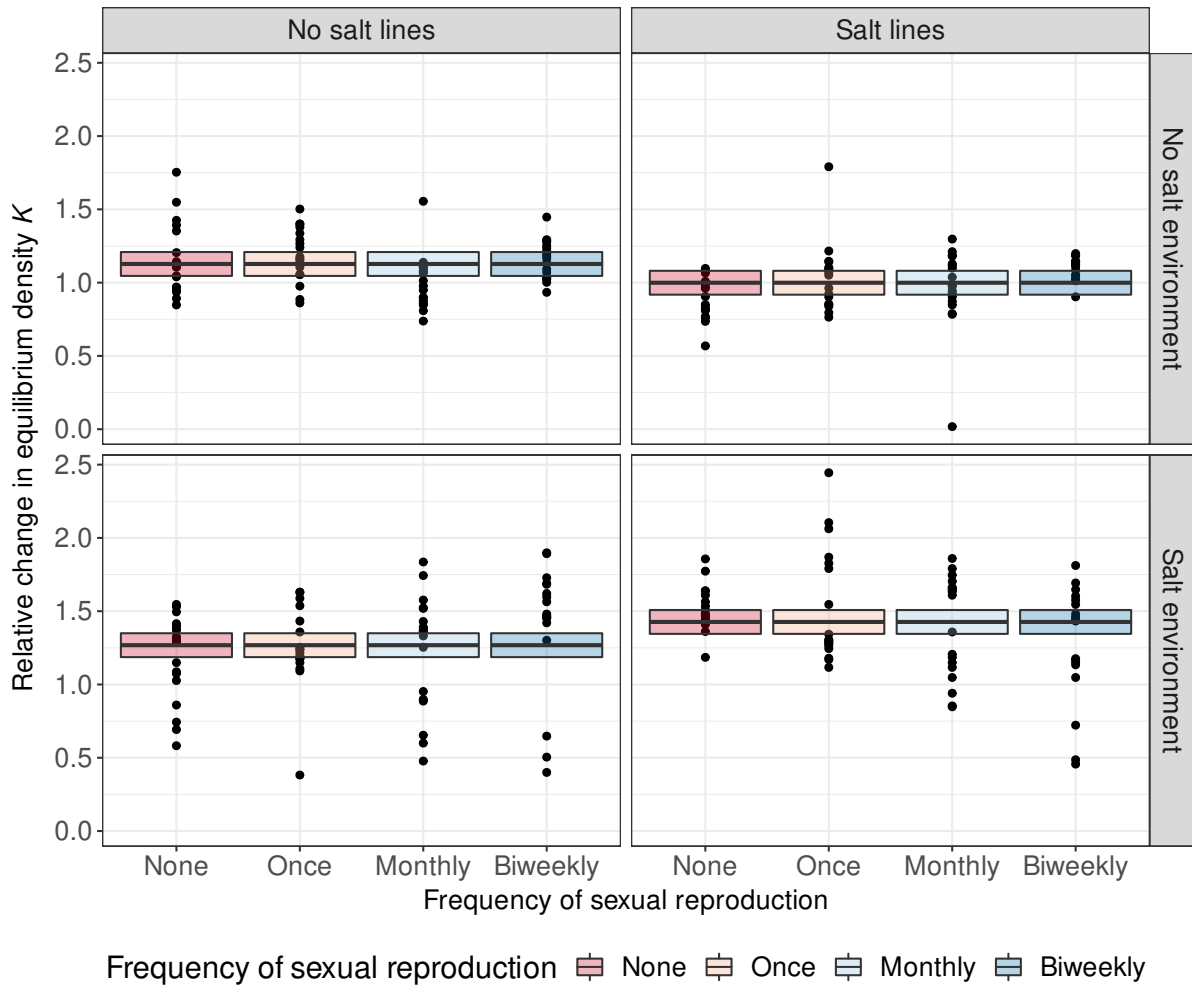

Figure 6: **Evolutionary trade-offs affect the equilibrium density  $K$ .** The left panels shows data and model predictions for the no salt lines, and the right panels for the salt lines. Top panels show data and model predictions in the no salt environment, whereas bottom panels show the salt environment. Circles represent individual measurements of change in equilibrium population density of evolved lines, relative to the ancestor. Boxplots show the model predictions (black lines) and 95 % confidence intervals (shaded areas) for the fixed effect estimates of the best fitting model. Colours represent the frequency of sexual reproduction during experimental evolution.

## 159 Discussion

160 We investigated the evolutionary costs and benefits of sexual reproduction in a non stressful and  
161 a stressful environment, while minimizing the direct costs associated with sexual reproduction.  
162 Specifically, we assessed how the frequency of sexual reproduction affected adaptation to the  
163 selection environment, as well as trade-offs in terms of growth in another environment. We  
164 found that the frequency of sexual reproduction strongly affected adaptation in terms of the  
165 intrinsic rate of increase  $r_0$  in both the non stressful and the stressful environment (Figure  
166 3). Specifically, an increasing frequency of sexual reproduction reduced adaptive evolutionary  
167 change in the evolution lines, up to the point where adaptation was entirely prevented in those  
168 populations that experienced the highest frequency of sexual reproduction. Surprisingly, sexual  
169 reproduction had a negative effect for lines that evolved in both the stressful environment (salt  
170 lines) and the non-stressful environment (no salt lines). Additionally, adaptation to the selection  
171 environment was traded off with adaptation to the other environment, but only in terms of  
172 the equilibrium population density  $K$  (Figure 6), suggesting that there may be trade-offs for  
173 competitive ability in the different environments. In contrast, we observed that the intrinsic  
174 rate of increase  $r_0$  does not show such trade-offs, and a stronger increase in  $r_0$  in the salt  
175 environment is associated with also a stronger increase in  $r_0$  in the no salt environment. This  
176 suggests that selection for growth was not specific to the selection environment, but rather  
177 happened through selection for increased cell division or adaptation to the general experimental  
178 conditions, contrary to previous experiments where adaptation to salt stress led to environment  
179 specific changes in growth rates [33,35].

180 Our observation that an increasing frequency of sexual reproduction hinders adaptation dur-  
181 ing experimental evolution at first glance appears in contrast with our own prediction (see also  
182 Figure 2) and past theoretical work. Based on theoretical predictions [26–31], we would have  
183 expected to observe that sexual reproduction is most beneficial when it happens at a low to  
184 intermediate frequency. Additionally, we would have expected that higher frequencies of sex-  
185 ual reproduction would be more adaptive in those evolution lines that experienced a stressful  
186 environment during experimental evolution (i.e. salt lines). Previous experimental studies have  
187 found that sexual reproduction may speed up adaptation of populations, especially when they

188 are subjected to complex or stressful environments [8–10,12–15,34]. Whereas our observation  
189 may seem to be at odds with these previous studies, the cause of these differences may lie in  
190 the initial conditions of the experiment. In our current experiment, the ancestral population was  
191 both genetically diverse, and outcrossed, as we generated this population by mixing together  
192 24 clonal lines and subjecting the resulting population to three cycles of sexual reproduction.  
193 In this case, selection can likely act efficiently on this starting population, as the sexual re-  
194 production prior to the start of the evolution experiment may have generated beneficial allele  
195 combinations from the mixed clonal lines. This observation would also be in line with previous  
196 findings that up to three rounds of sexual reproduction may facilitate adaptation in *Chlamy-*  
197 *domonas* populations, before sexual reproduction had diminishing returns on adaptation [34].  
198 Theoretical work has indicated that in such a case of well-mixed populations, sexual repro-  
199 duction may be less advantageous, as it will no longer affect the genetic variation needed for  
200 effective selection [30]. In contrast, several of the previous studies started out with populations  
201 which had either an extremely low genetic diversity (single or few clonal lines; [8,14,15,35])  
202 or with populations with an extremely high degree of linkage disequilibrium, as they consisted  
203 of clonal lines that were mixed together, but did not experience any previous recombination  
204 [13]. Under these conditions, sexual reproduction may have played a more beneficial role. In  
205 case of the clonal populations, sexual reproduction may have played a beneficial role either by  
206 purging deleterious mutations or bringing together beneficial mutations/reducing clonal inter-  
207 ference [36–39]. In the genetically more diverse populations but with a high degree of linkage  
208 disequilibrium, sexual reproduction may also have aided adaptation, by generating beneficial  
209 allele combinations from the existing genetic variation present in the different clonal popula-  
210 tions [28,40,41]. This is also in line with the theoretical prediction that sexual reproduction is  
211 mainly beneficial for populations by reducing selection interference between mutations/clonal  
212 lines [7].

213 However, the strong negative effects that sexual reproduction had on adaptation in our well  
214 mixed populations was still surprising, but may help explain why facultative sexual species tend  
215 to engage only infrequently in sexual reproduction. Indeed, when looking at the natural world,  
216 many species have the capability to reproduce both asexually or sexually, and facultative sexual

217 reproducing species typically engage in sexual reproduction only infrequently and when faced  
218 with adverse conditions (e.g. [42–46]). Whereas past studies have shown how sexual reproduc-  
219 tion may be beneficial for adapting to new conditions (see above), these studies for two reasons  
220 did not elucidate why species would only engage infrequently in sexual reproduction. Firstly,  
221 although this studies show very well how sexual reproduction can aid adaptation, the starting  
222 populations from these experiments are often not representative of typical natural populations  
223 (due to the extremely low genetic diversity and strong linkage disequilibrium; see above), and  
224 may be more similar to, for example, the conditions of invasions or small founder populations.  
225 Under such conditions, the benefits of sexual reproduction may be larger than in natural popu-  
226 lations (e.g. [17,47]). Secondly, given that these past results indicated that sexual reproduction  
227 strongly aided adaptation under those experimental conditions, they could not yet explain why  
228 there would be only infrequent sexual reproduction in natural populations. Such an interme-  
229 diate to low frequency of sexual reproduction, as observed in nature, could either be caused  
230 by direct costs associated with sexual reproduction (e.g. slow cell division, two-fold cost of  
231 sex, [7,24,25]), or due to evolutionary costs when sexual reproduction becomes too frequent.  
232 Whereas the direct costs are likely to play at least partially a role in reducing the frequency of  
233 sexual reproduction, they may be unlikely to entirely explain the observed frequency of sexual  
234 reproduction in facultative sexually reproducing species. Especially for populations that are  
235 near equilibrium density, and for which a slower cell division is therefore likely less costly, the  
236 direct costs of sexual reproduction may be low, as also suggested by empirical observations  
237 [6,21,25,48,49] as well as one experimental study [16]. Thus, to explain the predicted and  
238 observed relatively low frequency of sexual reproduction of facultative sexually reproducing  
239 species, an additional explanation may be necessary in the form of an evolutionary cost due to  
240 too frequent sexual reproduction. Indeed as suggested by the results of our experiment, where  
241 we observed that sexual reproduction was hindering adaptation, even when we minimized the  
242 indirect costs of sexual reproduction, evolutionary costs due to too frequent sexual reproduction  
243 may play a major role in why many species only engage infrequently in sexual reproduction.

244 Although our experiment provides strong evidence that evolutionary costs due to too fre-  
245 quent sexual reproduction may limit adaptation, this in no way negates the existing compelling

246 evidence from previous experimental studies that sexual reproduction may facilitate adaptation  
247 under certain conditions. As discussed above, the difference in these findings may stem from  
248 the initial conditions of these different evolution experiments. Consequently, there may exist  
249 a gradient of conditions in genetic diversity and the degree of linkage disequilibrium during  
250 which the effect of sexual reproduction shifts from beneficial for adaptation to hindering adap-  
251 tation. Future work could further elucidate how the role of sexual reproduction hinges on these  
252 initial conditions. This question could be either tackled experimentally or empirically. Using an  
253 experimental design that carefully controls the degree of genetic variation and degree of linkage  
254 disequilibrium, one can evaluate either how sexual reproduction alters adaptation, or how the  
255 frequency of sexual reproduction itself changes depending on these initial conditions. Empiri-  
256 cal studies may investigate natural populations of facultative sexually reproducing species, and  
257 try to assess whether the frequency of sexual reproduction is affected by the genetic compo-  
258 sitions (standing genetic variation; linkage disequilibrium) of said populations. Additionally,  
259 future experimental work may further incorporate direct costs of sex into the equation (as al-  
260 ready partially done by Becks and Agrawal [16]), to see how this further alters the change in  
261 the frequency of sexual reproduction. In conclusion, we here demonstrated that too frequent  
262 sexual reproduction has a strong evolutionary cost in genetically diverse and outcrossed popu-  
263 lations, suggesting that the low frequency of sexual reproduction in natural populations may be  
264 in part due to such costs. Future experimental endeavours may help in further elucidating the  
265 costs and benefits of sexual reproduction, thus advancing our understanding on when and why  
266 sex may be (dis)favoured in natural populations.

## 267 **Acknowledgements**

268 F.M. was funded by the Swiss National Science Foundation, Early PostDoc Mobility Fellow-  
269 ship P2ZHP3\_199658.



## 270 **Author contributions**

271 F.M. and N.C. designed the experiment. Experimental work and statistical analyses were per-  
272 formed by F.M., and both authors interpreted the results. F.M. wrote the manuscript, with input  
273 from N.C..

## 274 **Data availability statement**

275 All data and model code is available on Github (DOI: 10.5281/zenodo.6788686).

## 276 **Materials and methods**

### 277 **Model species and general culturing conditions**

278 *Chlamydomonas reinhardtii* is a unicellular green alga, living in freshwater and soil environ-  
279 ments. Because of its ease in culturing, short generation time, and strict control over its re-  
280 productive cycle, this species is commonly used in evolution experiments [35,50–55]. We per-  
281 formed all experimental work with *C. reinhardtii* cultures under the same general conditions.  
282 We kept all cultures in a 23 °C incubator. During experimental evolution, we grew cultures ei-  
283 ther in 24 well plates, containing 2 mL of medium per well, or on agar plates containing 10 mL  
284 of Bold's medium supplemented with 15 gL<sup>-1</sup> of bacteriological agar [56]. During fitness as-  
285 says, we grew cultures in 96 well plates, containing 200 µL of medium per well. We kept 96  
286 well plates and 24 well plates at all times on a shaker, rotating at 180 rpm.

### 287 **Ancestral population**

288 We generated a genetically diverse and outcrossed ancestor population from 24 clonal strains of  
289 *C. reinhardtii* by subjecting them to three rounds of sexual reproduction (see the Supplementary  
290 Material Table S1 for a full list of all clones). To do so, we first grew all 24 clones to equilibrium  
291 density in a 24 well plate. We followed an established protocol to induce mating of the *C.*  
292 *reinhardtii* cells [9,35]. To do so, we first mixed all 24 clones in a 50 mL Falcon tube, and

293 centrifuged the Falcon tube for 10 minutes at 5000 rpm, in order to pellet the cells. We then  
294 decanted the supernatant, and resuspended cells in nitrogen free medium (distilled water), to  
295 induce mating. Subsequently, we incubated the cells in a 24 well plate (2 mL of culture per  
296 well) until the next day. We checked whether cells were mating through the formation of a  
297 mating mat. We then transferred the mating mat in each of the wells using an inoculation loop  
298 to an agar plate containing Bold's medium supplemented with  $15 \text{ gL}^{-1}$  of agar powder, and  
299 wrapped the plates in aluminium foil. Next, we incubated the wrapped agar plates in the dark  
300 for four days. After this incubation period, we placed the agar plates in a  $-20^\circ\text{C}$  freezer, in  
301 order to kill non-mating cells. We subsequently removed the aluminium foil, and incubated  
302 the cells in the light for an additional two days. Following this incubation in the light, we  
303 added 5 mL of Bold's medium to each of the agar plates, and left them for one hour to recover  
304 offspring cells from the mating. Next, we transferred 2 mL of medium from each agar plate  
305 to one well of a new 24 well plate, and incubated this plate for one week, in order for the  
306 populations to grow to equilibrium density. We then repeated this whole process (mixing all  
307 populations, incubation in nitrogen free medium, incubation in the dark, freezing and recovery  
308 of cells) two additional times to make sure populations were thoroughly outcrossed.

## 309 **Experimental evolution**

310 In this evolution experiment, we aimed at assessing how the abiotic environment (non-stressful  
311 versus stressful environment) and the frequency of sexual reproduction affected adaptation of  
312 the ancestral population. Because we were mainly interested in the evolutionary costs and ben-  
313 efits of sexual reproduction, we aimed to minimize the ecological costs associated with sexual  
314 reproduction. The sexual reproductive cycle of *C. reinhardtii* takes much longer than asexual  
315 reproduction. Therefore we subjected populations that were not scheduled for sexual reproduc-  
316 tion to an asexual control treatment (discussed below), aimed at ensuring that the number of  
317 generations was approximately similar for populations experiencing asexual or sexual repro-  
318 duction.

## 319 **Experimental design and handling**

320 We subjected a total of 48 replicate populations (from here on referred to as evolution lines) to  
321 experimental evolution. Half of those evolution lines experienced a non-stressful environment  
322 (Bold's medium), whereas the remaining half experienced evolution in a stressful environment  
323 (Bold's medium supplemented with  $4 \text{ g L}^{-1}$  NaCl). From this point on, we will refer to those  
324 evolution lines that experienced the stressful environment as "salt lines", and to the evolution  
325 lines that experienced the non-stressful environment as "no salt lines". In each of the abiotic  
326 environments, we subjected the remaining 24 populations to four different frequencies of sex-  
327 ual reproduction: none (pure asexual reproduction), once (single sexual reproduction event),  
328 monthly (sexual reproduction after every 4 weeks of asexual growth) or biweekly (sexual re-  
329 production after every 2 weeks of asexual growth). We thus had six replicate evolution lines  
330 per treatment combination. We subjected each of those evolution lines to a total of 24 weeks of  
331 experimental evolution. These 24 weeks consisted of eight cycles of three weeks, during which  
332 the same steps were repeated in every cycle. Each cycle consisted of a first week during which  
333 the evolution lines experienced either sexual reproduction or an asexual control treatment. The  
334 remaining two weeks consisted each of an asexual growth phase (asexual cell division). Af-  
335 ter these 24 weeks of experimental evolution, we subjected the evolution lines to a common  
336 garden treatment, after which we assessed the change in fitness of the evolution lines. Each  
337 of these handling steps is discussed in more detail below. A full overview of handling during  
338 experimental evolution can also be found in the Supplementary Material section S3.

## 339 **Sexual reproduction cycle and asexual control**

340 In order to induce sexual reproduction, we transferred 2 mL of culture from the appropriate  
341 evolution lines (i.e. the evolution lines scheduled for sexual reproduction) to a 2 mL Eppendorf  
342 tube. We centrifuged those eppendorf tubes for 10 minutes at 5000 rpm in order to pellet  
343 the cells. We then decanted the supernatant, and resuspended cells in 2 mL of nitrogen free  
344 medium (distilled water). Subsequently, we transferred the evolution lines to a new 24 well  
345 plate, which we incubated for one day. For evolution lines which were not scheduled for sexual  
346 reproduction (asexual control), we transferred 2 mL of culture directly to the new 24 well plate.

347 Mating was visually confirmed through the formation of mating mats in the medium. After the  
348 24 hours of incubation, we transferred the mating cells (mating mats) to an agar plate using  
349 an inoculation loop. For the asexual control, we instead pipetted 100  $\mu\text{L}$  of culture directly  
350 on the agar plate. We subsequently wrapped the plates in aluminium foil, and incubated them  
351 for four days in the dark. After this incubation period, we placed the agar plates for sexually  
352 reproducing populations in a  $-20^\circ\text{C}$  freezer for four hours in order to kill the asexual cells.  
353 We kept the agar plates with the evolution lines scheduled for asexual control in the incubator  
354 during this time. Afterwards, we removed the aluminium foil, and incubated the agar plates for  
355 an additional two days in the light. We then added 5 mL of medium to each of the agar plates  
356 (respectively Bold's medium or Bold's medium +  $4\text{ gL}^{-1}$  NaCl) and left the plates to rest for  
357 one hour, in order to recover the cells. We then transferred 2 mL of culture to a new 24 well  
358 plate.

### 359 **Asexual growth cycle**

360 To initiate an asexual growth cycle, we prepared fresh 24 well plates by adding medium to all  
361 the wells (2 mL of Bold's medium for the non-stressful environment or 2 mL of Bold's medium  
362 +  $4\text{ gL}^{-1}$  NaCl for the stressful environment). We then transferred 20  $\mu\text{L}$  of culture from the  
363 evolution lines to these new 24 well plates, and incubated these plates for one week.

### 364 **Common garden treatment**

365 After experimental evolution, we subjected the evolution lines to a common garden environ-  
366 ment, to reduce maternal and epigenetic effects. To do so, we transferred 20  $\mu\text{L}$  of culture  
367 from the evolution lines to new 24 well plates containing Bold's medium supplemented with  
368  $100\text{ mgL}^{-1}$  Ampicillin, to ensure all evolution lines were free from potential bacterial contam-  
369 ination. We subsequently incubated these common garden populations for one asexual growth  
370 phase (seven days). Thus, the evolution lines should have experienced a common garden en-  
371 vironment for approximately 8 generations, prior to starting the population growth assays (see  
372 the section below).

### 373 **Population growth assays**

374 To assess how the abiotic environment and the frequency of sexual reproduction experienced  
375 during evolution affected fitness change, we measured population growth of the evolution lines  
376 and the ancestor population in both abiotic environments (Bold's medium or Bold's medium +  
377  $4 \text{ g L}^{-1}$  NaCl). For each of the evolved lines, we measured population growth of three replicate  
378 populations in each environment (total of 48 evolution lines  $\times$  2 environments  $\times$  3 replicates  
379 = 288 assays). For the ancestor population, we measured population growth of 36 replicate  
380 populations in each of both environment (2 environments  $\times$  36 replicates = 72 assays). We  
381 prepared population growth assays in 96 well plates, by adding 200  $\mu\text{L}$  of medium to the wells,  
382 and inoculating the wells with 2  $\mu\text{L}$  of culture from respectively the evolution lines or the an-  
383 cestor population. To avoid drying out of the assays due to evaporation, we only used the  
384 central 60 wells of the 96 well plates for assays, and filled the wells of the outside rows and  
385 columns with medium only. Subsequently, we incubated the assays, and allowed them to grow  
386 for seven days, during which we measured population size twice per day (total of 14 absorbance  
387 measurements). Following established protocols [9,32,35], we measured optical density in the  
388 wells ( $\text{OD}_{750}$ ) as a proxy for population size. To account for background absorbance from the  
389 plates and medium, we subtracted for each plate the median absorbance of the empty wells (i.e.  
390 wells containing medium but no *Chlamydomonas* cells) from all absorbance measurements.

### 391 **Statistical analysis**

392 We performed all statistical analyses using the R-statistical language version 4.1.2 [57].

### 393 **Calculation of fitness change**

394 In order to investigate fitness change of the evolution lines, we assessed two aspects of pop-  
395 ulation growth: the intrinsic rate of increase ( $r_0$ ) and the maximum density that populations  
396 reached (equilibrium population density  $K$ ). In order to estimate  $r_0$ , we first estimated the  
397 growth rate between each two subsequent absorbance measurements  $n_1$  and  $n_2$  as:

$$398 \quad r_i = (\ln(\text{absorbance}_2) - \ln(\text{absorbance}_1)) / (t_2 - t_1)$$

399 where  $t_1$  and  $t_2$  are the times since the start of the assays for the absorbance measurements.

400 We then estimated  $r_0$  as the maximum value of all  $r_i$  values for each of the assays. Secondly, we  
401 calculated  $K$  as the maximum absorbance observed in each of the assays, over all 14 absorbance  
402 measurements.

403 In order to calculate change in fitness, relative to the ancestor population, we subsequently  
404 divided our  $r_0$  estimates and  $K$  estimates by the median value for the ancestor population. This  
405 allowed us to assess how the traits in the evolved lines had changed, relative to the ancestor, with  
406 a value of 1 indicating that evolution lines performed equally well as the ancestor populations,  
407 whereas positive (negative) values indicate an increase (decrease) in fitness.

### 408 **Assessment of adaptation to the selective environment**

409 To investigate how adaptation to the selective environment experienced during experimental  
410 evolution was affected by evolutionary history and the frequency of sexual reproduction, we  
411 assessed the change of fitness (intrinsic rate of increase and equilibrium population density) of  
412 evolved populations, in the assay environment that matched the environment they experienced  
413 during experimental evolution. That is, fitness change of no salt lines in Bold's medium and  
414 fitness change of salt lines in Bold's medium + 4 gL<sup>-1</sup> NaCl. To do so, we first fit a linear  
415 mixed model [nlme package, version 3.1-155; 58], using evolutionary history (salt lines/no salt  
416 lines) and frequency of sexual reproduction (none/once/monthly/biweekly) as fixed effects,  
417 and population ID as a random effect. We subsequently ranked all possible models using the  
418 dredge function in the MuMIn package [version 1.43.17; 59], based on the AICc criterion [60].  
419 We selected the best fitting model, and report summary and type-III anova output. We do so  
420 separately for the intrinsic rate of increase ( $r_0$ ) and the maximum population density ( $K$ ).

### 421 **Assessment of trade-offs in adaptation to the different environments**

422 To assess whether evolution lines experienced trade-offs in adaptation to the different envi-  
423 ronments, we next assessed the change of fitness (intrinsic rate of increase and equilibrium  
424 population density) of evolution lines, in both assay environments (salt environment and no  
425 salt environment). To do so, we fit a linear mixed model [nlme package, version 3.1-155;  
426 58], using the abiotic environment (no salt environment/salt environment), evolutionary history

427 (salt lines/no salt lines) and frequency of sexual reproduction (none/once/monthly/biweekly) as  
428 fixed effects, and population ID as a random effect. We then ranked all possible models based  
429 on the AICc criterion [60] using the dredge function in the MuMIn package [version 1.43.17;  
430 59]. Following model ranking, we selected the best fitting model (lowest AICc score), and  
431 report summary and type-III anova output of this best fitting model. We separately discuss the  
432 best fitting model for the intrinsic rate of increase ( $r_0$ ) and the maximum population density  
433 ( $K$ ).

## 434 References

- 435 [1] Kawecki, T. J. & Ebert, D. Conceptual issues in local adaptation. *Ecol. Lett.* **7**,  
436 1225–1241 (2004). URL [https://onlinelibrary.wiley.com/doi/abs/10.1111/  
437 j.1461-0248.2004.00684.x](https://onlinelibrary.wiley.com/doi/abs/10.1111/j.1461-0248.2004.00684.x).
- 438 [2] Holt, R. D. & Keitt, T. H. Species' borders: A unifying theme in ecology. *Oikos* **108**, 3–6  
439 (2005). URL <http://www.jstor.org/stable/3548486>.
- 440 [3] Bijlsma, R. & Loeschcke, V. Environmental stress, adaptation and evolution: an overview.  
441 *J. Evol. Biol.* **18**, 744–749 (2005). URL [https://onlinelibrary.wiley.com/doi/  
442 abs/10.1111/j.1420-9101.2005.00962.x](https://onlinelibrary.wiley.com/doi/abs/10.1111/j.1420-9101.2005.00962.x).
- 443 [4] Hardie, D. C. & Hutchings, J. A. Evolutionary ecology at the extremes of species' ranges.  
444 *Environ. Rev.* **18**, 1–20 (2010). URL [http://www.nrcresearchpress.com/doi/abs/  
445 10.1139/A09-014](http://www.nrcresearchpress.com/doi/abs/10.1139/A09-014).
- 446 [5] Maynard-Smith, J. *The evolution of sex* (Cambridge University Press, 1978).
- 447 [6] Bell, G. *The masterpiece of nature: The evolution and genetics of sexuality* (Univ of  
448 California Pr, Berkeley, 1982).
- 449 [7] Hartfield, M. & Keightley, P. D. Current hypotheses for the evolution of sex and recomb-  
450 nation. *Int. Zool.* **7**, 192–209 (2012). URL [https://onlinelibrary.wiley.com/doi/  
451 abs/10.1111/j.1749-4877.2012.00284.x](https://onlinelibrary.wiley.com/doi/abs/10.1111/j.1749-4877.2012.00284.x).
- 452 [8] Colegrave, N. Sex releases the speed limit on evolution. *Nature* **420**, 664–666 (2002).  
453 URL <https://www.nature.com/articles/nature01191>.
- 454 [9] Petkovic, N. & Colegrave, N. Sex increases the probability of evolutionary rescue in  
455 the presence of a competitor. *J. Evol. Biol.* **32**, 1252–1261 (2019). URL [https://  
456 onlinelibrary.wiley.com/doi/abs/10.1111/jeb.13525](https://onlinelibrary.wiley.com/doi/abs/10.1111/jeb.13525).
- 457 [10] Becks, L. & Agrawal, A. F. The evolution of sex Is favoured during adaptation to new  
458 environments. *PLoS Biol.* **10**, e1001317 (2012). URL [https://journals.plos.org/  
459 plosbiology/article?id=10.1371/journal.pbio.1001317](https://journals.plos.org/plosbiology/article?id=10.1371/journal.pbio.1001317).



- 460 [11] Haafke, J., Chakra, M. A. & Becks, L. Eco-evolutionary feedback promotes Red Queen  
461 dynamics and selects for sex in predator populations. *Evolution* **70**, 641–652 (2016). URL  
462 <https://onlinelibrary.wiley.com/doi/abs/10.1111/evo.12885>.
- 463 [12] Luijckx, P. *et al.* Higher rates of sex evolve during adaptation to more complex environ-  
464 ments. *Proc. Natl. Acad. Sci. U.S.A.* **114**, 534–539 (2017). URL <http://www.pnas.org/content/114/3/534>.
- 466 [13] Moerman, F., Fronhofer, E. A., Wagner, A. & Altermatt, F. Gene swamping alters evo-  
467 lution during range expansions in the protist *Tetrahymena thermophila*. *bioRxiv* 863340  
468 (2020). URL <https://www.biorxiv.org/content/10.1101/863340v2>.
- 469 [14] Goddard, M. R., Godfray, H. C. J. & Burt, A. Sex increases the efficacy of natu-  
470 ral selection in experimental yeast populations. *Nature* **434**, 636–640 (2005). URL  
471 <https://www.nature.com/articles/nature03405>.
- 472 [15] McDonald, M. J., Rice, D. P. & Desai, M. M. Sex speeds adaptation by altering the  
473 dynamics of molecular evolution. *Nature* **531**, 233–236 (2016). URL <http://www.nature.com/nature/journal/v531/n7593/abs/nature17143.html>.
- 475 [16] Becks, L. & Agrawal, A. F. Higher rates of sex evolve under K-selection. *J. Evol. Biol.*  
476 **26**, 900–905 (2013). URL <https://onlinelibrary.wiley.com/doi/abs/10.1111/jeb.12110>.
- 478 [17] Currat, M., Ruedi, M., Petit, R. J. & Excoffier, L. The hidden side of  
479 invasions: massive introgression by local genes. *Evolution* **62**, 1908–1920  
480 (2008). URL <http://onlinelibrary.wiley.com/doi/10.1111/j.1558-5646.2008.00413.x/abstract>.
- 482 [18] Brockhurst, M. A. *et al.* Running with the Red Queen: the role of biotic conflicts in  
483 evolution. *Proc. R. Soc. B-Biol. Sci.* **281** (2014). URL <https://www.ncbi.nlm.nih.gov/pmc/articles/PMC4240979/>.

- 485 [19] Dickinson, H. G., Hiscock, S. J., Crane, P. R. & Richards, A. J. Apomixis in flowering  
486 plants: an overview. *Philos. Trans. Royal Soc. B* **358**, 1085–1093 (2003). URL <https://royalsocietypublishing.org/doi/abs/10.1098/rstb.2003.1294>.  
487
- 488 [20] Nieuwenhuis, B. P. S. & James, T. Y. The frequency of sex in fungi. *Philos. Trans. Royal*  
489 *Soc. B* **371**, 20150540 (2016). URL [https://royalsocietypublishing.org/doi/](https://royalsocietypublishing.org/doi/full/10.1098/rstb.2015.0540)  
490 [full/10.1098/rstb.2015.0540](https://royalsocietypublishing.org/doi/full/10.1098/rstb.2015.0540).
- 491 [21] Suomalainen, E. Parthenogenesis in Animals. In Demerec, M. (ed.) *Advances in Genetics*,  
492 vol. 3, 193–253 (Academic Press, 1950). URL [https://www.sciencedirect.com/](https://www.sciencedirect.com/science/article/pii/S0065266008600863)  
493 [science/article/pii/S0065266008600863](https://www.sciencedirect.com/science/article/pii/S0065266008600863).
- 494 [22] Vershinina, A. O. & Kuznetsova, V. G. Parthenogenesis in Hexapoda: Entognatha and  
495 non-holometabolous insects. *J. Zoolog. Syst. Evol.* **54**, 257–268 (2016). URL <https://onlinelibrary.wiley.com/doi/abs/10.1111/jzs.12141>.  
496
- 497 [23] Neaves, W. B. & Baumann, P. Unisexual reproduction among vertebrates. *Trends Genet.*  
498 **27**, 81–88 (2011). URL [https://www.sciencedirect.com/science/article/pii/](https://www.sciencedirect.com/science/article/pii/S0168952510002295)  
499 [S0168952510002295](https://www.sciencedirect.com/science/article/pii/S0168952510002295).
- 500 [24] Lively, C. M. & Lloyd, D. G. The Cost of Biparental Sex Under Individual Selection.  
501 *Am. Nat.* **135**, 489–500 (1990). URL [https://www.journals.uchicago.edu/doi/](https://www.journals.uchicago.edu/doi/10.1086/285058)  
502 [10.1086/285058](https://www.journals.uchicago.edu/doi/10.1086/285058).
- 503 [25] Williams, G. C. *Sex and Evolution. (MPB-8), Volume 8* (Princeton Univer-  
504 sity Press, 2020). URL [https://www.degruyter.com/document/doi/10.12987/](https://www.degruyter.com/document/doi/10.12987/9780691209920/html)  
505 [9780691209920/html](https://www.degruyter.com/document/doi/10.12987/9780691209920/html).
- 506 [26] Green, R. F. & Noakes, D. L. G. Is a little bit of sex as good as a lot? *J. Theor. Biol.*  
507 **174**, 87–96 (1995). URL [https://www.sciencedirect.com/science/article/](https://www.sciencedirect.com/science/article/pii/S0022519385700811)  
508 [pii/S0022519385700811](https://www.sciencedirect.com/science/article/pii/S0022519385700811).
- 509 [27] Hurst, L. D. & Peck, J. R. Recent advances in understanding of the evolution and main-  
510 tenance of sex. *Trends Ecol. Evol.* **11**, 46–52 (1996).

- 511 [28] Otto, S. P. & Lenormand, T. Resolving the paradox of sex and recombination. *Nat. Rev.*  
512 *Genet.* **3**, 252–261 (2002). URL <https://www.nature.com/articles/nrg761>.
- 513 [29] Hadany, L. & Comeron, J. M. Why Are Sex and Recombination So Common? *Ann. N. Y.*  
514 *Acad. Sci.* **1133**, 26–43 (2008). URL [https://onlinelibrary.wiley.com/doi/abs/](https://onlinelibrary.wiley.com/doi/abs/10.1196/annals.1438.011)  
515 [10.1196/annals.1438.011](https://onlinelibrary.wiley.com/doi/abs/10.1196/annals.1438.011).
- 516 [30] Otto, S. The evolutionary enigma of sex. *Am. Nat.* **174**, S1–S14 (2009). URL <https://www.journals.uchicago.edu/doi/10.1086/599084>.
- 517
- 518 [31] D’Souza, T. G. & Michiels, N. K. The Costs and Benefits of Occasional Sex: Theoretical  
519 Predictions and a Case Study. *J. Hered.* **101**, S34–S41 (2010). URL [https://doi.org/](https://doi.org/10.1093/jhered/esq005)  
520 [10.1093/jhered/esq005](https://doi.org/10.1093/jhered/esq005).
- 521 [32] Lachapelle, J., Reid, J. & Colegrave, N. Repeatability of adaptation in experimental  
522 populations of different sizes. *Proc. Natl. Acad. Sci. U.S.A.* **282**, 20143033 (2015). URL  
523 <https://royalsocietypublishing.org/doi/full/10.1098/rspb.2014.3033>.
- 524 [33] Lachapelle, J. & Bell, G. Evolutionary rescue of sexual and asexual populations  
525 in a deteriorating environment. *Evolution* **66**, 3508–3518 (2012). URL [https://](https://onlinelibrary.wiley.com/doi/abs/10.1111/j.1558-5646.2012.01697.x)  
526 [onlinelibrary.wiley.com/doi/abs/10.1111/j.1558-5646.2012.01697.x](https://onlinelibrary.wiley.com/doi/abs/10.1111/j.1558-5646.2012.01697.x).
- 527 [34] Kaltz, O. & Bell, G. The ecology and genetics of fitness in *Chlamydomonas*. XII. Re-  
528 peated sexual episodes increase rates of adaptation to novel environments. *Evolution* **56**,  
529 1743–1753 (2002).
- 530 [35] Lachapelle, J. & Colegrave, N. The effect of sex on the repeatability of evolution in dif-  
531 ferent environments. *Evolution* **71**, 1075–1087 (2017). URL [https://onlinelibrary.](https://onlinelibrary.wiley.com/doi/abs/10.1111/evo.13198)  
532 [wiley.com/doi/abs/10.1111/evo.13198](https://onlinelibrary.wiley.com/doi/abs/10.1111/evo.13198).
- 533 [36] Hill, W. G. & Robertson, A. The effect of linkage on limits to  
534 artificial selection. *Genet. Research* **8**, 269–294 (1966). URL  
535 [https://www.cambridge.org/core/journals/genetics-research/](https://www.cambridge.org/core/journals/genetics-research/article/effect-of-linkage-on-limits-to-artificial-selection/5CCFE11C1F8108242ED02AEC8BA5DD50)  
536 [article/effect-of-linkage-on-limits-to-artificial-selection/](https://www.cambridge.org/core/journals/genetics-research/article/effect-of-linkage-on-limits-to-artificial-selection/5CCFE11C1F8108242ED02AEC8BA5DD50)  
537 [5CCFE11C1F8108242ED02AEC8BA5DD50](https://www.cambridge.org/core/journals/genetics-research/article/effect-of-linkage-on-limits-to-artificial-selection/5CCFE11C1F8108242ED02AEC8BA5DD50).

- 538 [37] Gerrish, P. J. & Lenski, R. E. The fate of competing beneficial mutations in an asex-  
539 ual population. *Genetica* **102**, 127 (1998). URL [https://doi.org/10.1023/A:](https://doi.org/10.1023/A:1017067816551)  
540 1017067816551.
- 541 [38] Peck, J. R. A ruby in the rubbish: beneficial mutations, deleterious mutations and the  
542 evolution of sex. *Genetics* **137**, 597–606 (1994). URL [https://www.genetics.org/](https://www.genetics.org/content/137/2/597)  
543 [content/137/2/597](https://www.genetics.org/content/137/2/597).
- 544 [39] Neiman, M., Lively, C. M. & Meirmans, S. Why sex? A pluralist approach revis-  
545 ited. *Trends Ecol. Evol.* **32**, 589–600 (2017). URL [http://www.cell.com/trends/](http://www.cell.com/trends/ecology-evolution/abstract/S0169-5347(17)30129-5)  
546 [ecology-evolution/abstract/S0169-5347\(17\)30129-5](http://www.cell.com/trends/ecology-evolution/abstract/S0169-5347(17)30129-5).
- 547 [40] Otto, S. P. & Barton, N. H. The evolution of recombination: removing the limits to  
548 natural selection. *Genetics* **147**, 879–906 (1997). URL [https://www.genetics.org/](https://www.genetics.org/content/147/2/879)  
549 [content/147/2/879](https://www.genetics.org/content/147/2/879).
- 550 [41] Burt, A. Perspective: Sex, recombination, and the efficacy of selection—Was Weismann  
551 right? *Evolution* **54**, 337–351 (2000). URL [https://onlinelibrary.wiley.com/](https://onlinelibrary.wiley.com/doi/abs/10.1111/j.0014-3820.2000.tb00038.x)  
552 [doi/abs/10.1111/j.0014-3820.2000.tb00038.x](https://onlinelibrary.wiley.com/doi/abs/10.1111/j.0014-3820.2000.tb00038.x).
- 553 [42] Hairston, N. G. & Olds, E. J. Population differences in the timing of diapause: adaptation  
554 in a spatially heterogeneous environment. *Oecologia* **61**, 42–48 (1984). URL [https:](https://link.springer.com/article/10.1007/BF00379086)  
555 [//link.springer.com/article/10.1007/BF00379086](https://link.springer.com/article/10.1007/BF00379086).
- 556 [43] Simon, J.-C., Rispe, C. & Sunnucks, P. Ecology and evolution of sex in aphids. *Trends*  
557 *Ecol. Evol.* **17**, 34–39 (2002). URL [http://www.sciencedirect.com/science/](http://www.sciencedirect.com/science/article/pii/S016953470102331X)  
558 [article/pii/S016953470102331X](http://www.sciencedirect.com/science/article/pii/S016953470102331X).
- 559 [44] Stelzer, C. P. & Snell, T. W. Induction of sexual reproduction in *Brachionus plicatilis*  
560 (Monogononta, Rotifera) by a density-dependent chemical cue. *Limnol. Oceanogr.* **48**,  
561 939–943 (2003). URL [https://aslopubs.onlinelibrary.wiley.com/doi/abs/](https://aslopubs.onlinelibrary.wiley.com/doi/abs/10.4319/lo.2003.48.2.0939)  
562 [10.4319/lo.2003.48.2.0939](https://aslopubs.onlinelibrary.wiley.com/doi/abs/10.4319/lo.2003.48.2.0939).
- 563 [45] Lynn, D. H. & Doerder, F. P. The life and times of *Tetrahymena*. *Methods Cell Biol.* **109**,  
564 9–27 (2012).

- 565 [46] Gerber, N., Kokko, H., Ebert, D. & Booksmythe, I. Daphnia invest in sexual reproduction  
566 when its relative costs are reduced. *Proc. R. Soc. B-Biol. Sci.* **285**, 20172176 (2018). URL  
567 <https://royalsocietypublishing.org/doi/full/10.1098/rspb.2017.2176>.
- 568 [47] Peischl, S., Kirkpatrick, M. & Excoffier, L. Expansion load and the evolutionary dynam-  
569 ics of a species range. *Am. Nat.* **185**, E81–E93 (2015). URL [http://www.journals.](http://www.journals.uchicago.edu/doi/abs/10.1086/680220)  
570 [uchicago.edu/doi/abs/10.1086/680220](http://www.journals.uchicago.edu/doi/abs/10.1086/680220).
- 571 [48] Glesener, R. R. & Tilman, D. Sexuality and the Components of Environmental Uncer-  
572 tainty: Clues from Geographic Parthenogenesis in Terrestrial Animals. *Am. Nat.* **112**,  
573 659–673 (1978). URL [https://www.journals.uchicago.edu/doi/abs/10.1086/](https://www.journals.uchicago.edu/doi/abs/10.1086/283308)  
574 [283308](https://www.journals.uchicago.edu/doi/abs/10.1086/283308).
- 575 [49] Tilquin, A. & Kokko, H. What does the geography of parthenogenesis teach us  
576 about sex? *Philos. Trans. Royal Soc. B* **371**, 20150538 (2016). URL [https://](https://royalsocietypublishing.org/doi/full/10.1098/rstb.2015.0538)  
577 [royalsocietypublishing.org/doi/full/10.1098/rstb.2015.0538](https://royalsocietypublishing.org/doi/full/10.1098/rstb.2015.0538).
- 578 [50] Kassen, R. & Bell, G. Experimental evolution in *Chlamydomonas*. IV. Selection in envi-  
579 ronments that vary through time at different scales. *Heredity* **80**, 732–741 (1998). URL  
580 <https://www.nature.com/articles/6883290>.
- 581 [51] Collins, S. & Bell, G. Phenotypic consequences of 1,000 generations of selection at  
582 elevated CO<sub>2</sub> in a green alga. *Nature* **431**, 566 (2004). URL [https://www.nature.](https://www.nature.com/articles/nature02945)  
583 [com/articles/nature02945](https://www.nature.com/articles/nature02945).
- 584 [52] Ratcliff, W. C. *et al.* Experimental evolution of an alternating uni- and multicellular  
585 life cycle in *Chlamydomonas reinhardtii*. *Nat. Commun.* **4**, 2742 (2013). URL [https:](https://www.nature.com/articles/ncomms3742)  
586 [//www.nature.com/articles/ncomms3742](https://www.nature.com/articles/ncomms3742).
- 587 [53] Haafke, J., Abou Chakra, M. & Becks, L. Eco-evolutionary feedback promotes Red  
588 Queen dynamics and selects for sex in predator populations. *Evolution* **70**, 641–652  
589 (2016). URL <https://onlinelibrary.wiley.com/doi/abs/10.1111/evo.12885>.

- 590 [54] Koch, H. & Becks, L. The consequences of facultative sex in a prey adapting to predation.  
591 *J. Evol. Biol.* **30**, 210–220 (2017). URL [https://onlinelibrary.wiley.com/doi/](https://onlinelibrary.wiley.com/doi/abs/10.1111/jeb.12987)  
592 [abs/10.1111/jeb.12987](https://onlinelibrary.wiley.com/doi/abs/10.1111/jeb.12987).
- 593 [55] Böndel, K. B. *et al.* Inferring the distribution of fitness effects of spon-  
594 taneous mutations in *Chlamydomonas reinhardtii*. *PLoS Biol.* **17**, e3000192  
595 (2019). URL [https://journals.plos.org/plosbiology/article?id=10.1371/](https://journals.plos.org/plosbiology/article?id=10.1371/journal.pbio.3000192)  
596 [journal.pbio.3000192](https://journals.plos.org/plosbiology/article?id=10.1371/journal.pbio.3000192).
- 597 [56] Chapter 8 - *Chlamydomonas* in the Laboratory. In Harris, E. H., Stern, D. B. & Wit-  
598 man, G. B. (eds.) *The Chlamydomonas Sourcebook (Second Edition)*, 241–302 (Academic  
599 Press, London, 2009). URL [https://www.sciencedirect.com/science/article/](https://www.sciencedirect.com/science/article/pii/B9780123708731000083)  
600 [pii/B9780123708731000083](https://www.sciencedirect.com/science/article/pii/B9780123708731000083).
- 601 [57] R Core Team. *R: A language and environment for statistical computing* (R Foundation for  
602 Statistical Computing, Vienna, Austria, 2021). URL <https://www.R-project.org/>.
- 603 [58] Pinheiro, J., Bates, D., DebRoy, S., Sarkar, D. & R Core Team. *nlme: Linear and nonlin-*  
604 *ear mixed effects models* (2020). URL <https://CRAN.R-project.org/package=nlme>.
- 605 [59] Bartoń, K. *MuMIn: Multi-model inference* (2009).
- 606 [60] Gelman, A., Hwang, J. & Vehtari, A. Understanding predictive information criteria for  
607 Bayesian models. *Stat. Comput.* **24**, 997–1016 (2014). URL [https://doi.org/10.](https://doi.org/10.1007/s11222-013-9416-2)  
608 [1007/s11222-013-9416-2](https://doi.org/10.1007/s11222-013-9416-2).
